# Supplementary material
Source: Royal Society of Chemistry journal article supplement (doi:10.1039/d5nr04938e)
Supplement: d5nr04938e1.pdf [file d5nr04938e1.pdf]

## Supporting Information

### **Janus Polymeric Discs by Seeded Swelling Emulsion Polymerization**

*Linlin Zhang,<sup>\*a,b</sup> Fuyan Huang,<sup>a</sup> Shiyu Du,<sup>a</sup> Guolin Zhang<sup>c</sup> and Dayin Sun<sup>\*b</sup>*

<sup>a</sup>Liaoning Provincial Key Laboratory for Synthesis and Preparation of Special Functional Materials, Shenyang University of Chemical Technology, Shenyang 110142, China.

<sup>b</sup>Institute of Polymer Science and Engineering, Department of Chemical Engineering, Tsinghua University, Beijing 100084, China.

<sup>c</sup>Liaoning Provincial Key Laboratory for Green Synthesis and Preparative Chemistry of Advanced Materials, Liaoning University, Shenyang 110036, China.

\*E-mail: [zhanglinlin@syuct.edu.cn](mailto:zhanglinlin@syuct.edu.cn)

\*E-mail: [sundayin@tsinghua.edu.cn](mailto:sundayin@tsinghua.edu.cn)

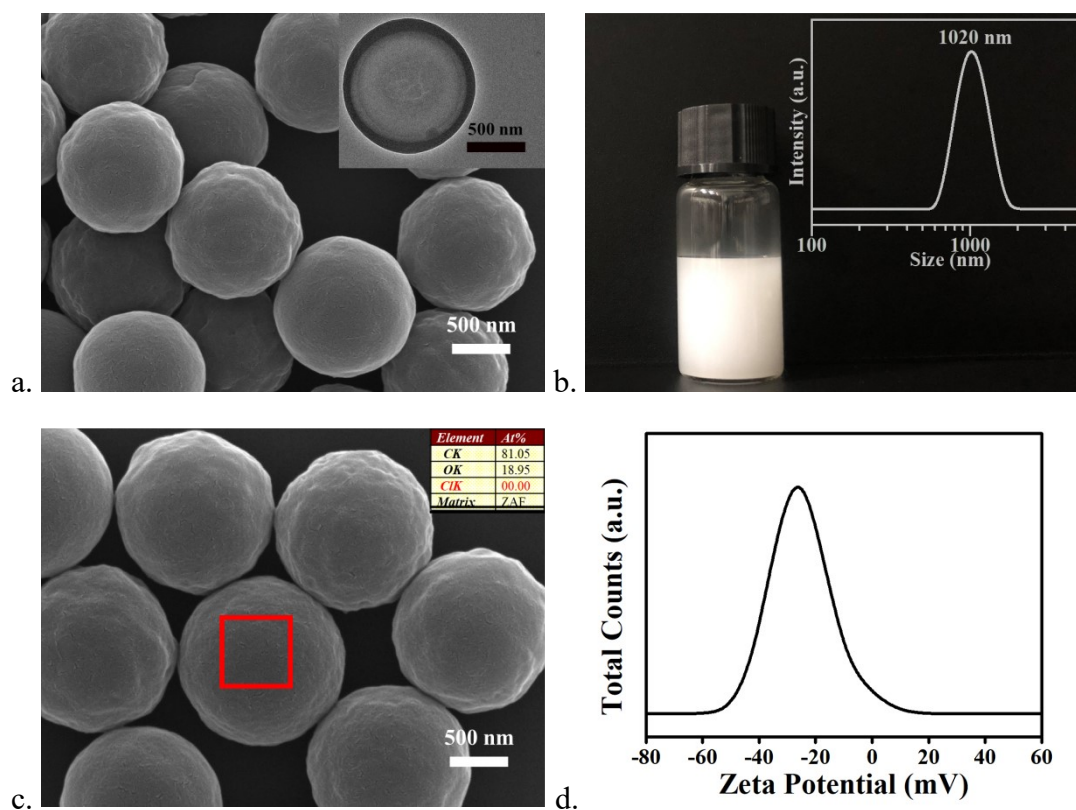

**Figure S1.** (a) SEM and inset TEM images of the PS hollow sphere seed (HP-1055); (b) the aqueous dispersion and the inset DLS trace; (c) EDX spectrum of the PS hollow sphere, no Cl element present at the sphere; (d) Zeta potential of the PS hollow sphere seed aqueous dispersion.

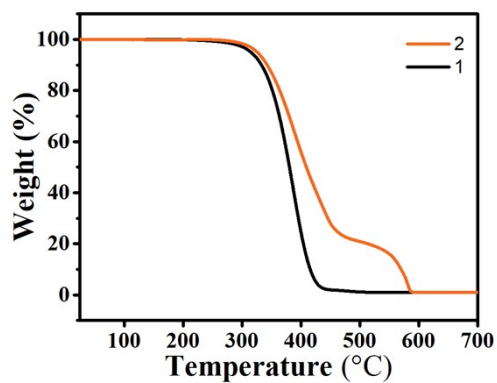

**Figure S2.** TGA traces of (1) the PS hollow sphere (HP-1055) and (2) the PS@cPVBC composite sphere.

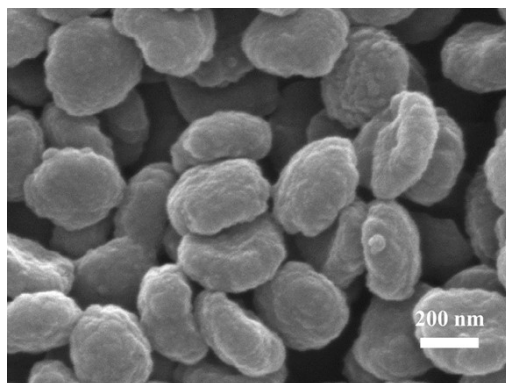

**Figure S3.** SEM image of the cPVBC disc after the polymerization for 12 h.

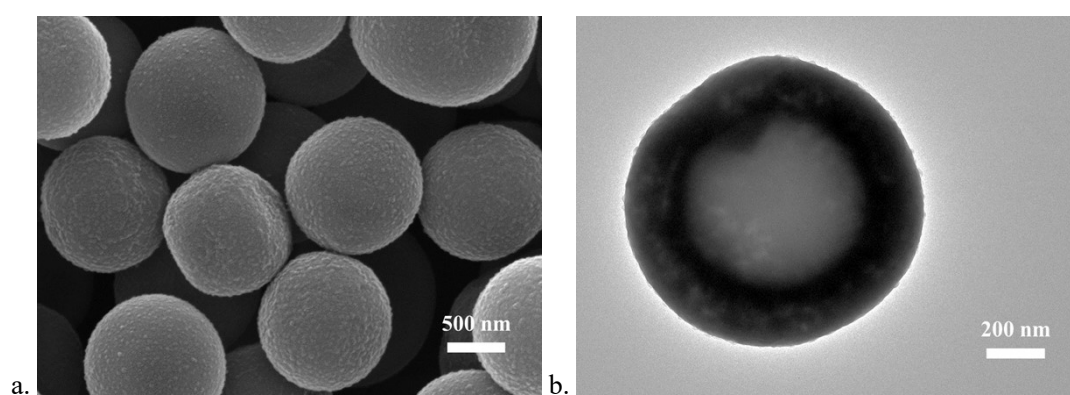

**Figure S4.** (a) SEM and (b) TEM images of the PS/cPVBC composite sphere after the polymerization at DVB/VBC ratio of 4/1. The sphere was treated with DMF.

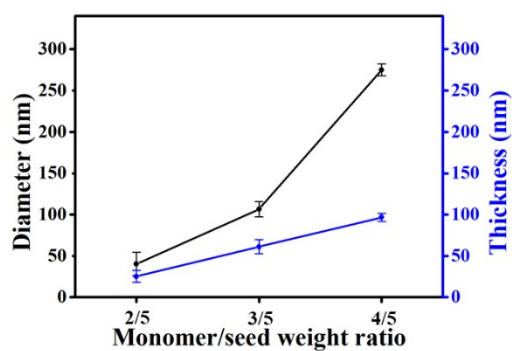

**Figure S5.** Dependences of diameter and thickness of the cPVBC discs on monomer/seed ratio.

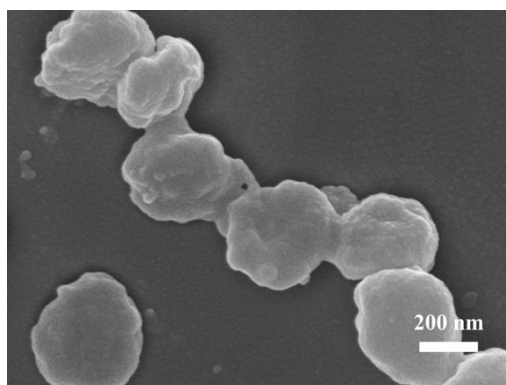

**Figure S6.** SEM image of the *c*PVBC disc synthesized at the monomer/seed ratio of 5/5.

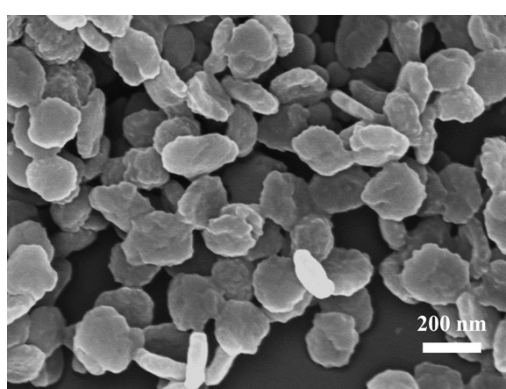

**Figure S7.** SEM image of the *c*PVBC disc by the polymerization at 1.5 wt% of AIBN.

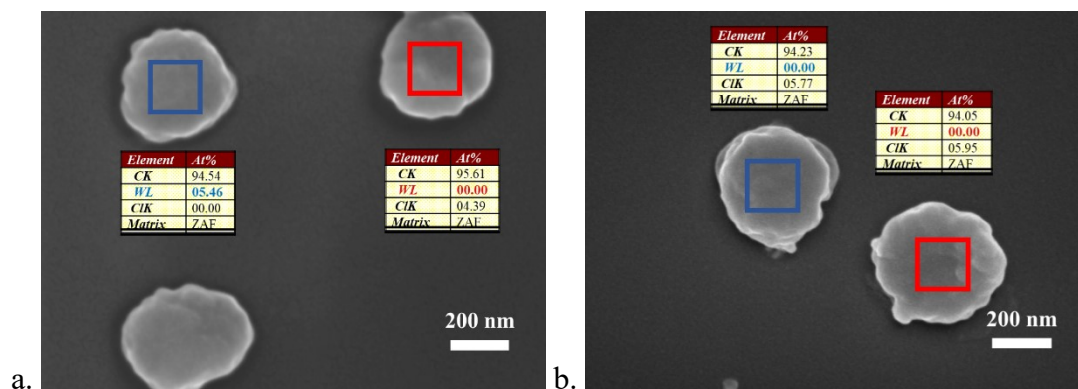

**Figure S8.** EDX results of (a) the Janus disc of *c*PVBC-PEO and (b) the disc of *c*PVBC. The two samples were treated by labelling with phosphotungstic acid (PTA).

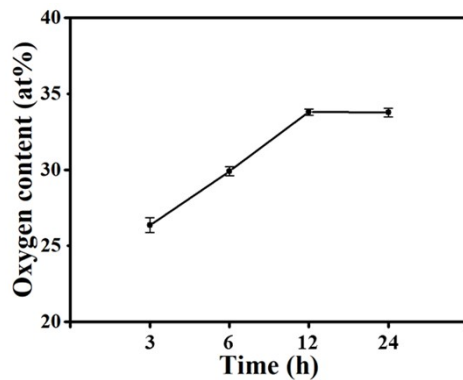

**Figure S9.** Oxygen content at convex side of the Janus disc of *c*PVBC-PEO with increasing the nucleophilic substitution time.

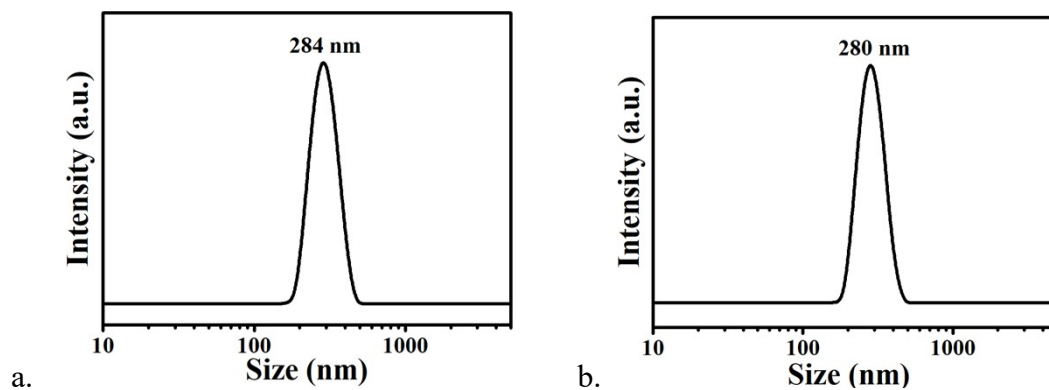

**Figure S10.** DLS traces of (a) the Janus disc of PNIPAM-*c*PVBC-PEO and (b) the Janus disc of *c*PVBC-PEO. The two samples were dispersed in ethanol.

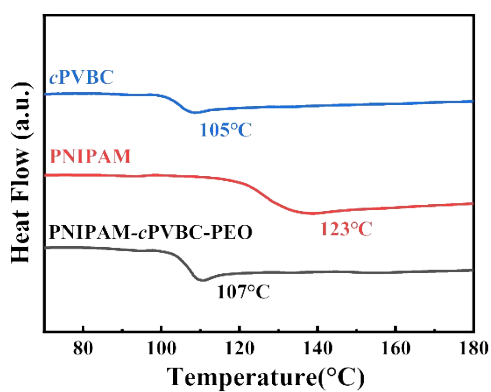

**Figure S11.** DSC curves of *c*PVBC, PNIPAM and PNIPAM-*c*PVBC-PEO Janus discs, with their glass transition temperatures marked.

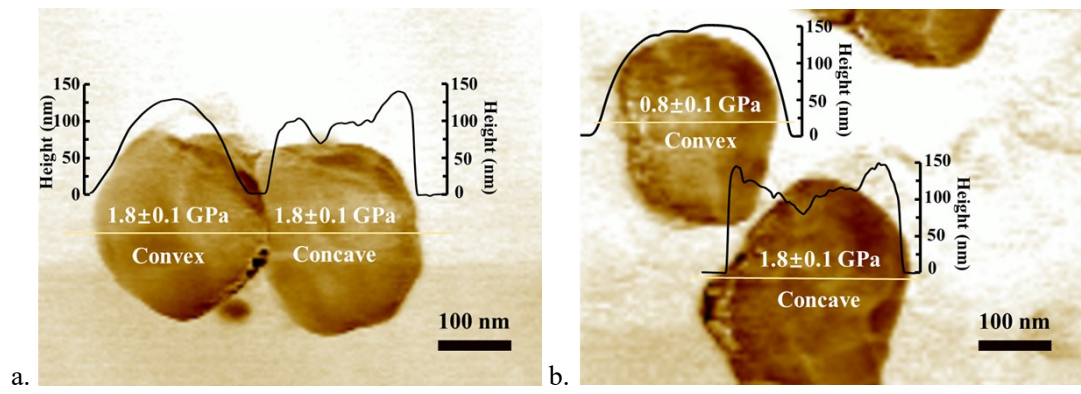

**Figure S12.** Distinguishing convex and concave sides of the discs by AMF height imaging: (a) *c*PVBC; (b) *c*PVBC-PEO. Moduli were measured at the convex and concave sides.

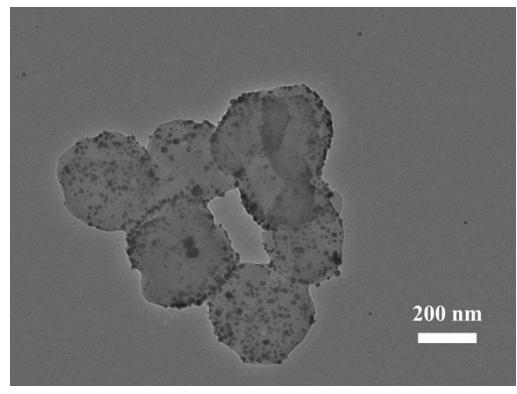

**Figure S13.** TEM image of the disc of PNIPAM-*c*PVBC-PEO after labelling with Au NPs.

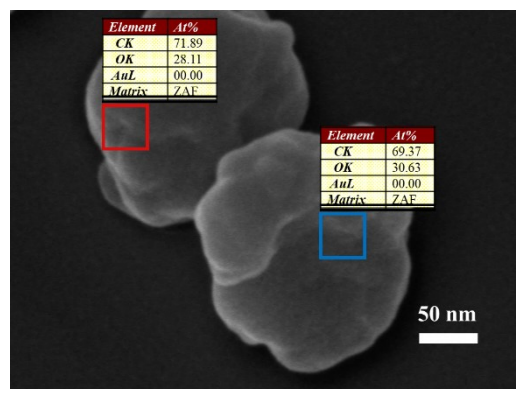

**Figure S14.** SEM image and EDX result of the *c*PVBC-PEO disc after treatment with Au NPs.

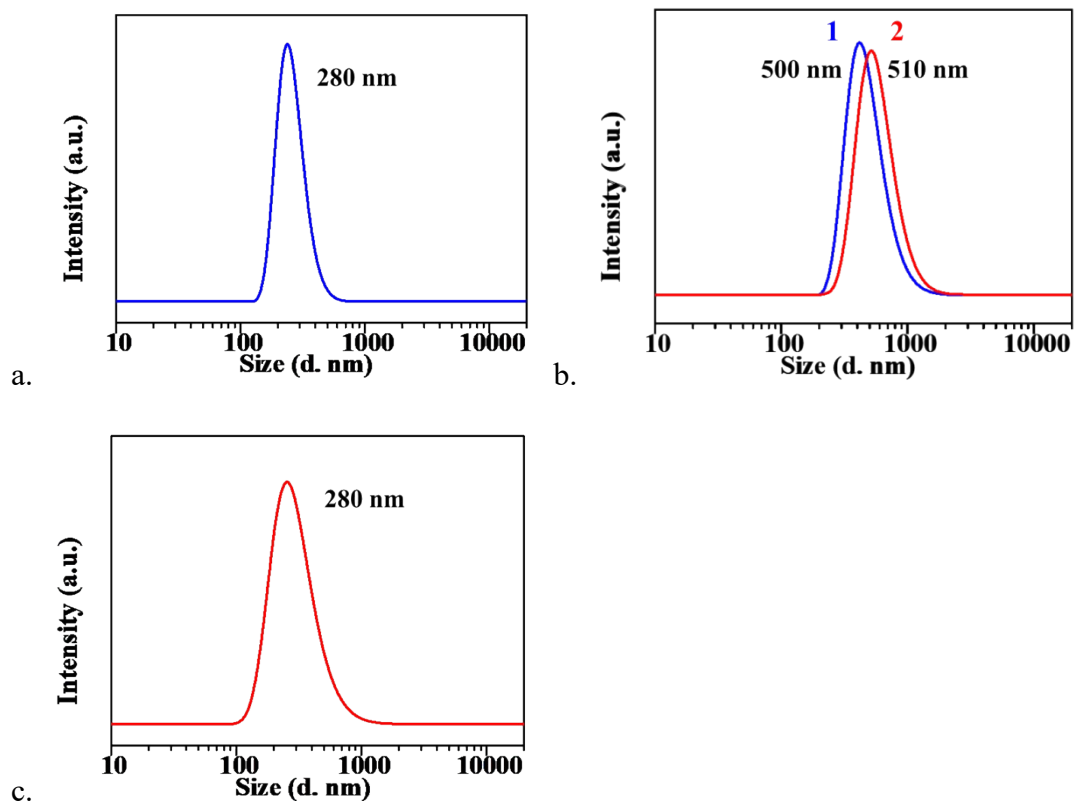

**Figure S15.** (a) DLS trace of PNIPAM-*c*PVBC-PEO in water at 25 °C; (b) (1) in water and (2) *n*-decane at 40 °C; (c) DLS trace of PNIPAM-*c*PVBC-PEO in *n*-decane at 85 °C.

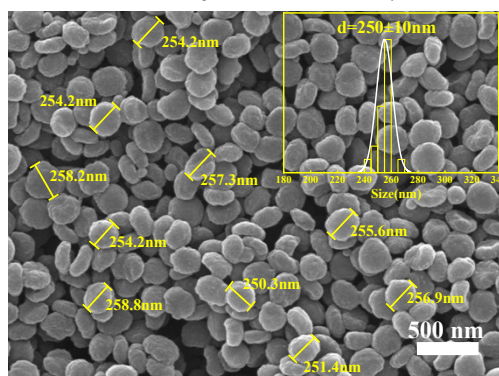

**Figure S16.** SEM image of PNIPAM-*c*PVBC-PEO disks (inset: particle size distribution).
